# Supplementary material for: Modeling anti-IL-6 therapy using breast cancer patient-derived xenografts
Source: PubMed Central journal article supplement (PMC5356531; doi:10.18632/oncotarget.11815), 2016-09-01
Supplement: oncotarget-07-67956-s001.pdf [file oncotarget-07-67956-s001.pdf]

# Modeling anti-IL-6 therapy using breast cancer patient-derived xenografts

## Supplementary Material

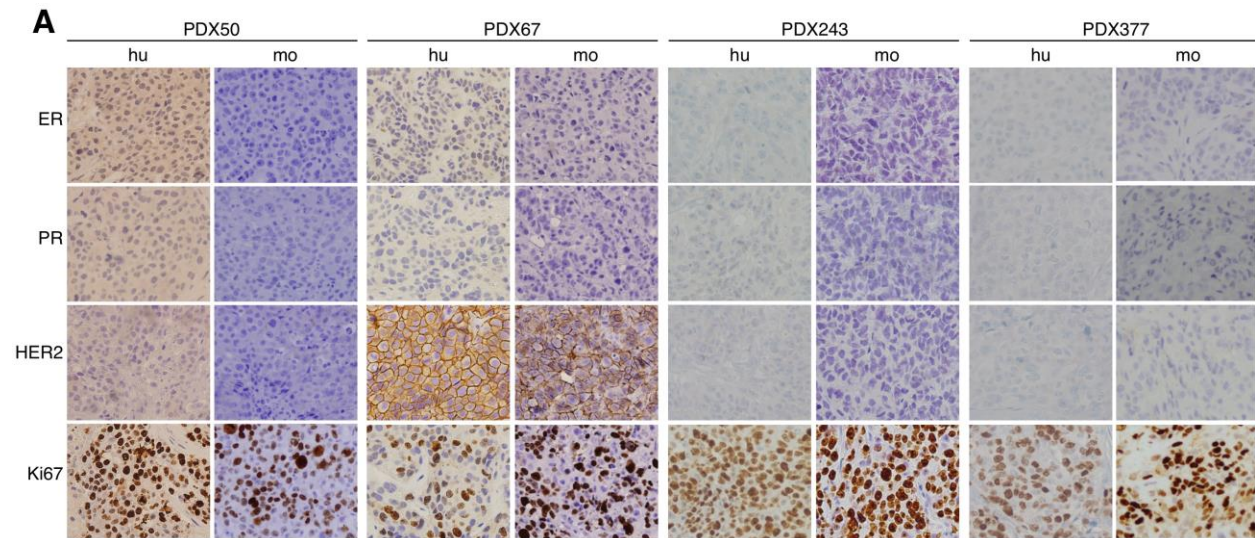

**Fig. S1.** The expression of the estrogen receptor (ER), progesterone receptor (PR), human epidermal growth factor receptor 2 (HER2) and Ki-67 were evaluated in samples from the indicated patient (hu, human) and the corresponding PDX (mo, mouse).
